# Supplementary material for: pUDK-HGF Gene Therapy to Relieve CLI Rest Pain and Ulcers: A Phase II, Double-Blind, Randomized Placebo-Controlled Trial
Source: Research Square preprint supplement (doi:10.21203/rs.3.rs-101447/v1), 2020-11-05
Supplement: Supplementary file 1 [file 930f0e615392f904e411d77a.docx]

Supplementary Material:

Tab VAS score changes in rest pain patients without analgesics

| **Follow-up** |  | **Placebo** | **Low-dose** | **Medial-dose** | **High-dose** |
| --- | --- | --- | --- | --- | --- |
| N(94) |  | 25 | 23 | 25 | 21 |
| Screening |  |  |  |  |  |
| Mean(Sd) |  | 5.70(1.22) | 5.83(1.24) | 5.84(1.29) | 6.00(1.25) |
| Median |  | 5.5 | 6.0 | 6.0 | 6.0 |
| Min～Max |  | 4.00~8.50 | 4.00~8.50 | 4.00~8.50 | 4.00~8.50 |
| p |  | 0.8825 | | | |
| Day 0 |  |  |  |  |  |
| Mean(Sd) |  | 5.60(1.20) | 5.80(1.22) | 5.90(1.30) | 5.88(1.30) |
| Median |  | 5.0 | 6.0 | 6.0 | 6.0 |
| Min～Max |  | 4.0~8.5 | 4.0~8.5 | 4.0~8.5 | 3.0~8.5 |
| p |  | 0.8307 | | | |
| Day 14 |  |  |  |  |  |
| Mean(Sd) |  | 4.86(1.26) | 4.83(1.29) | 4.72(1.56) | 4.52(1.54) |
| Median |  | 5.0 | 4.5 | 4.0 | 4.5 |
| Min～Max |  | 3.0~8.0 | 3.0~8.5 | 3.0~8.0 | 0.0~7.5 |
| p |  | 0.8594 | | | |
| Day 28 |  |  |  |  |  |
| Mean(Sd) |  | 4.24(1.32) | 3.72(1.47) | 3.40(1.79) | 3.76(1.23) |
| Median |  | 4.0 | 3.5 | 3.0 | 4.0 |
| Min～Max |  | 2.0~7.5 | 2.0~7.0 | 0.0~7.5 | 2.0~7.0 |
| p |  | 0.255 | | | |
| Day 60 |  |  |  |  |  |
| Mean(Sd) |  | 3.54(1.40) | 2.40(1.61) | 2.72(1.65) | 3.12(1.11) |
| Median |  | 3.5 | 2.0 | 3.0 | 3.0 |
| Min～Max |  | 0.0~6.0 | 0.0~6.0 | 0.0~6.0 | 1.5~6.0 |
| p |  | 0.0496 | | | |
| Day 90 |  |  |  |  |  |
| Mean(Sd) |  | 2.82(1.53) | 1.68(1.51) | 1.89(1.49) | 1.95(1.74) |
| Median |  | 3.0 | 1.0 | 2.0 | 2.0 |
| Min～Max |  | 0.0~5.0 | 0.0~5.5 | 0.0~4.0 | 0.0~7.0 |
| p |  | 0.0621 | | | |
| Day 180 |  |  |  |  |  |
| Mean(Sd) |  | 1.54(1.47) | 0.80(1.23) | 0.46(0.88) | 1.00(1.70) |
| Median |  | 1.0 | 0.0 | 0.0 | 0.0 |
| Min～Max |  | 0.0~4.0 | 0.0~4.0 | 0.0~3.0 | 0.0~6.0 |
| p |  | 0.043 | | | |
